# Supplementary material for: Prevalence of Carbendazin Resistance in Field Populations of the Rice False Smut Pathogen Ustilaginoidea virens from Jiangsu, China, Molecular Mechanisms, and Fitness Stability
Source: MDPI journal article supplement (doi:10.3390/jof8121311), 2022-12-16
Supplement: s1 [file s1]

**Table S1.** Deposited DNA sequences of *Uvβ1Tub* and *Uvβ2Tub* of *Ustilaginoidea virens* isolates in GenBank.

| Species                      | Gene ID    | Isolate | Accession Numbers |
|------------------------------|------------|---------|-------------------|
| <i>Ustilaginoidea virens</i> | UV8b_05680 | HWD     | OP379799          |
|                              | UV8b_05680 | JS60    | OP379800          |
|                              | UV8b_05680 | JY7b    | OP379801          |
|                              | UV8b_05680 | JY11a   | OP379802          |
|                              | UV8b_05680 | JY30b   | OP379803          |
|                              | UV8b_05680 | GY13c   | OP379804          |
|                              | UV8b_05680 | GY14b   | OP379805          |
|                              | UV8b_05680 | GY20a   | OP379806          |
|                              | UV8b_05680 | GY47c   | OP379807          |
|                              | UV8b_05680 | GY64a   | OP379808          |
|                              | UV8b_05680 | GY65b   | OP379809          |
|                              | UV8b_05680 | JY4a    | OP379810          |
|                              | UV8b_05680 | JY18b   | OP379811          |
|                              | UV8b_05680 | JY20a   | OP379812          |
|                              | UV8b_05680 | JY22a   | OP379813          |
|                              | UV8b_05680 | JY24b   | OP379814          |
|                              | UV8b_05680 | JY33d   | OP379815          |
|                              | UV8b_05680 | XH3a    | OP379816          |
|                              | UV8b_05680 | XH33c   | OP379817          |
|                              | UV8b_05680 | XH36b   | OP379818          |
|                              | UV8b_05680 | XH39c   | OP379819          |
|                              | UV8b_05680 | XH46a   | OP379820          |
|                              | UV8b_05680 | XH57a   | OP379821          |
|                              | UV8b_05680 | HA26    | OP379822          |
|                              | UV8b_05680 | XH7b    | OP379823          |
|                              | UV8b_05680 | ZJ24    | OP379824          |
|                              | UV8b_05680 | GL11    | OP379825          |
|                              | UV8b_05680 | GL12b   | OP379826          |
|                              | UV8b_05680 | GL23    | OP379827          |
|                              | UV8b_05680 | HA17    | OP379828          |
|                              | UV8b_05680 | XH43b   | OP379829          |
|                              | UV8b_05680 | JR11    | OP379830          |
|                              | UV8b_05680 | JR12    | OP379831          |
|                              | UV8b_05680 | YD8     | OP425142          |
|                              | UV8b_05680 | ZJ7     | OP425143          |
|                              | UV8b_05680 | YZ11    | OP425144          |
|                              | UV8b_05680 | XH5a    | OP425145          |

|            |       |          |
|------------|-------|----------|
| UV8b_05383 | GL11  | OP425813 |
| UV8b_05383 | GL12b | OP425814 |
| UV8b_05383 | GL23  | OP425815 |
| UV8b_05383 | HA26  | OP425816 |
| UV8b_05383 | JR11  | OP425817 |
| UV8b_05383 | JR12  | OP425818 |
| UV8b_05383 | XH5a  | OP425819 |
| UV8b_05383 | XH7b  | OP425820 |
| UV8b_05383 | XH43b | OP425821 |
| UV8b_05383 | YD8   | OP425822 |
| UV8b_05383 | YZ11  | OP425823 |
| UV8b_05383 | ZJ7   | OP425824 |
| UV8b_05383 | ZJ24  | OP425825 |
| UV8b_05383 | JY7b  | OP425826 |
| UV8b_05383 | JY11a | OP425827 |
| UV8b_05383 | JY30b | OP425828 |
| UV8b_05383 | GY13c | OP425829 |
| UV8b_05383 | GY14b | OP425830 |
| UV8b_05383 | GY20a | OP425831 |
| UV8b_05383 | GY47c | OP425832 |
| UV8b_05383 | GY64a | OP425833 |
| UV8b_05383 | GY65b | OP425834 |
| UV8b_05383 | JY4a  | OP425835 |
| UV8b_05383 | JY18b | OP425836 |
| UV8b_05383 | JY20a | OP425837 |
| UV8b_05383 | JY22a | OP425838 |
| UV8b_05383 | JY24b | OP425839 |
| UV8b_05383 | JY33d | OP425840 |
| UV8b_05383 | XH3a  | OP425841 |
| UV8b_05383 | XH33c | OP425842 |
| UV8b_05383 | XH36b | OP425843 |
| UV8b_05383 | XH39c | OP425844 |
| UV8b_05383 | XH46a | OP425845 |
| UV8b_05383 | XH57a | OP425846 |
| UV8b_05383 | HWD   | OP425847 |
| UV8b_05383 | JS60  | OP425848 |
| UV8b_05383 | HA17  | OP425849 |

---
